# Supplementary material
Source: PubMed Central journal article supplement (PMC9933722)
Supplement: aac.00871-22-s0001.pdf [file aac.00871-22-s0001.pdf]

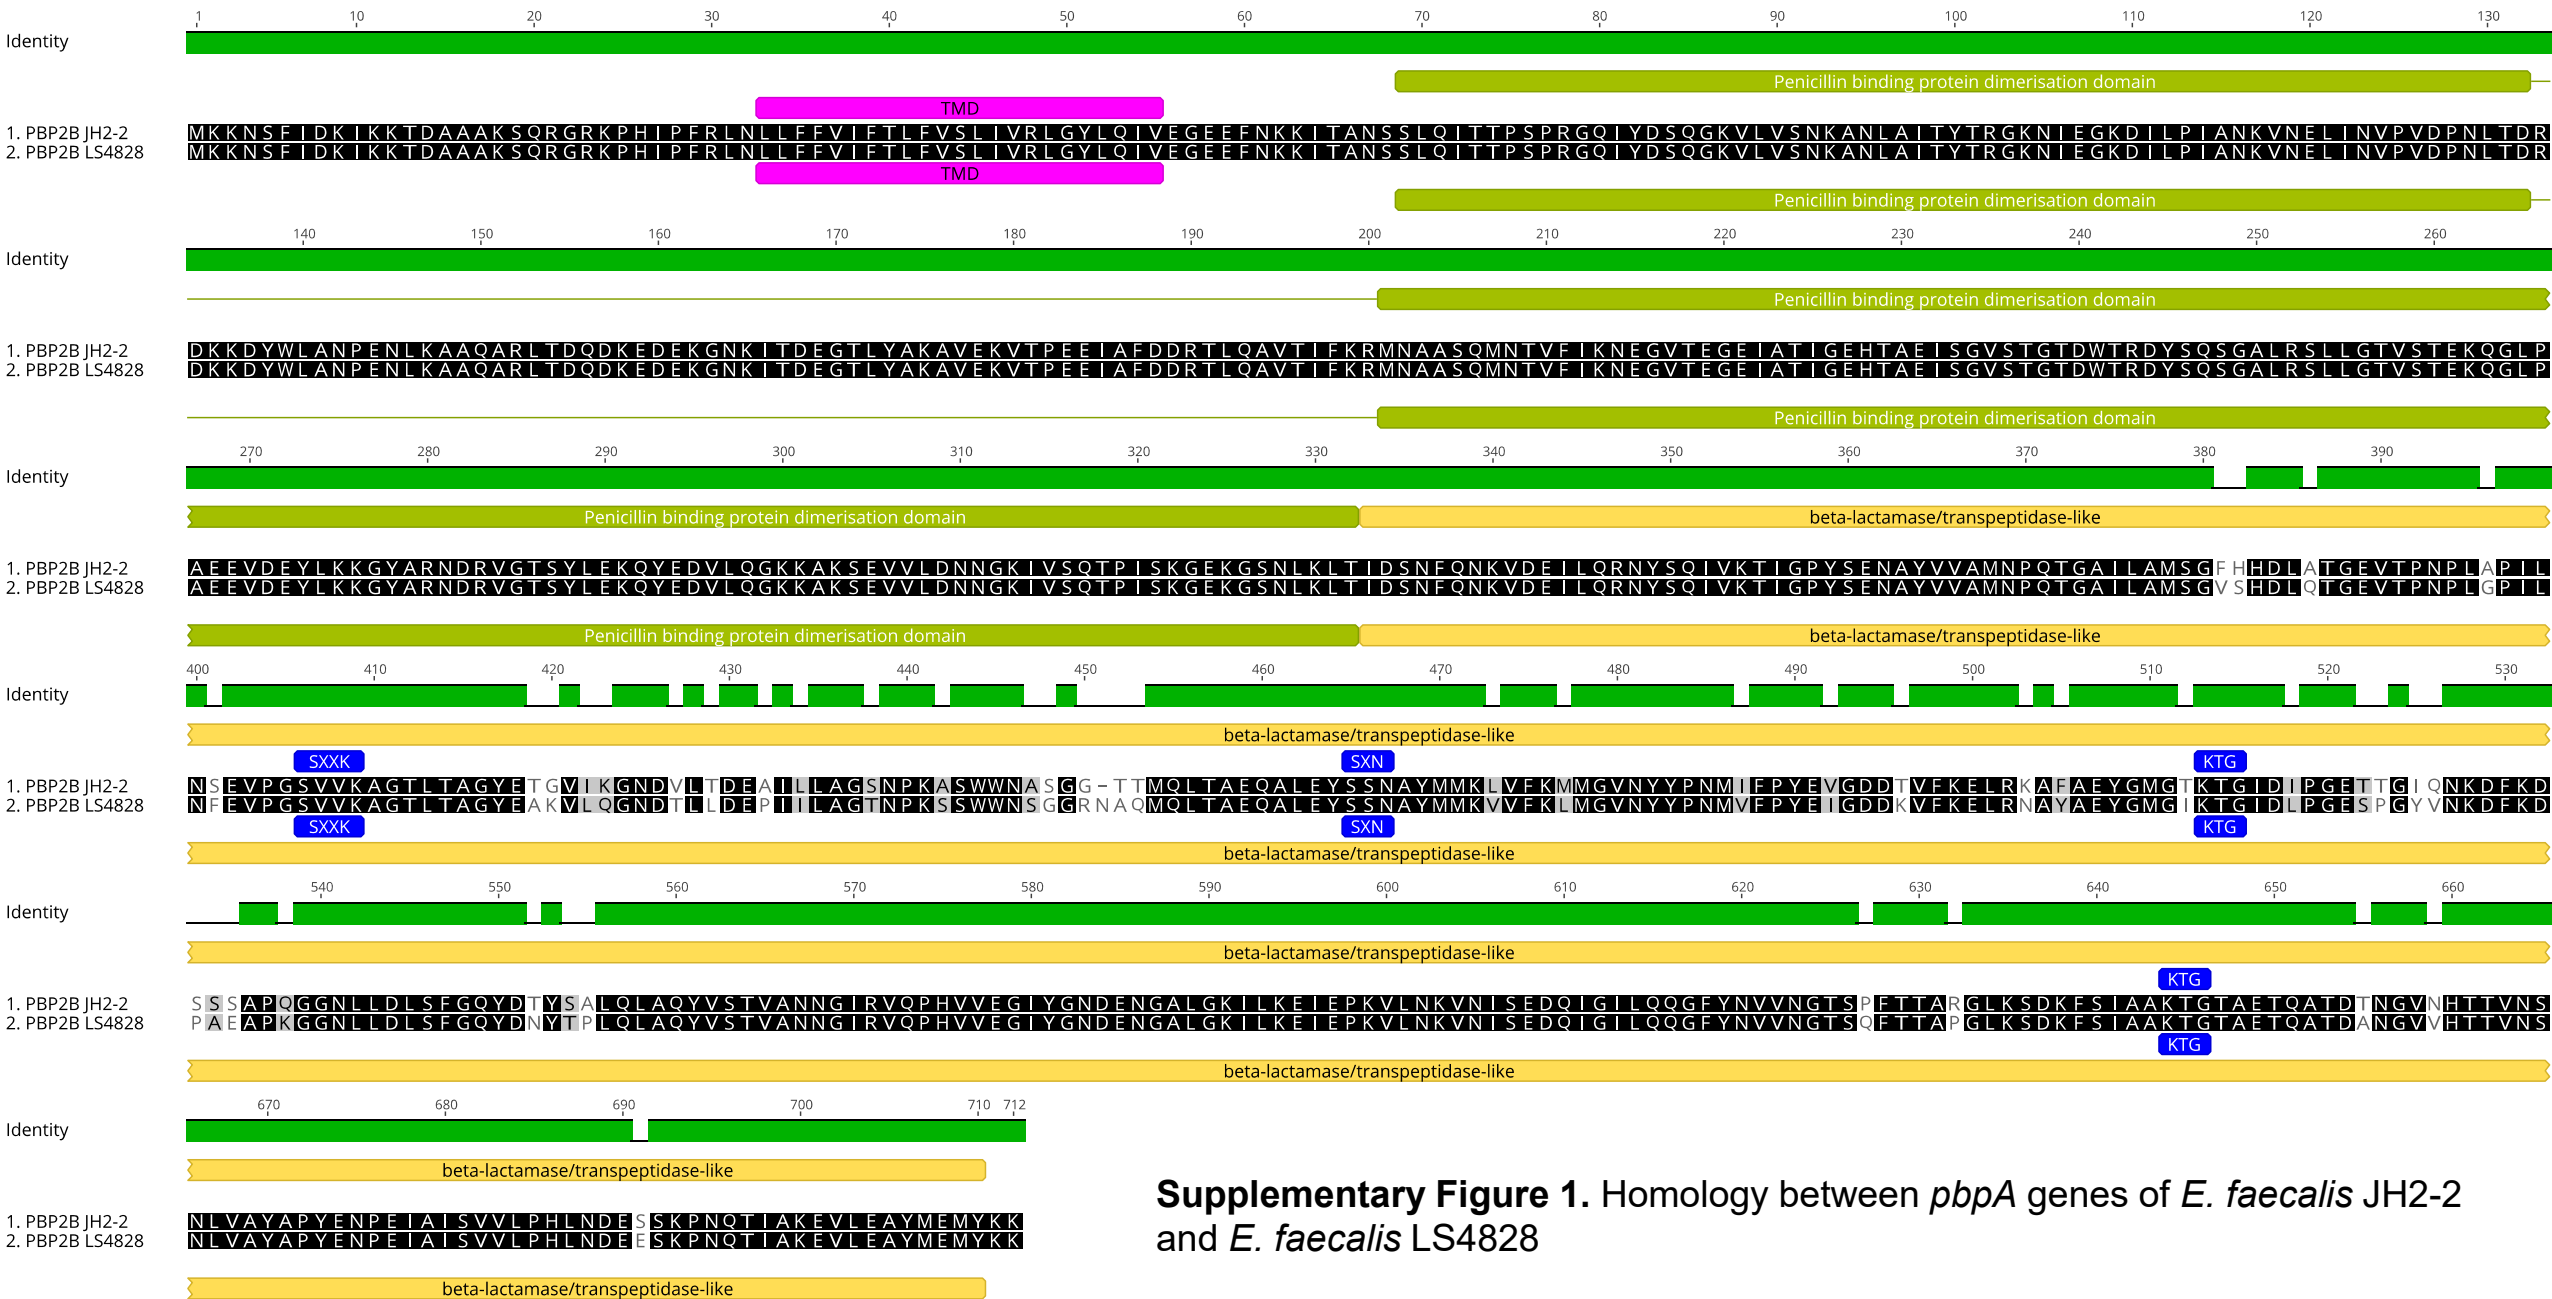

Supplementary Figure 1. Homology between *pbpA* genes of *E. faecalis* JH2-2 and *E. faecalis* LS4828

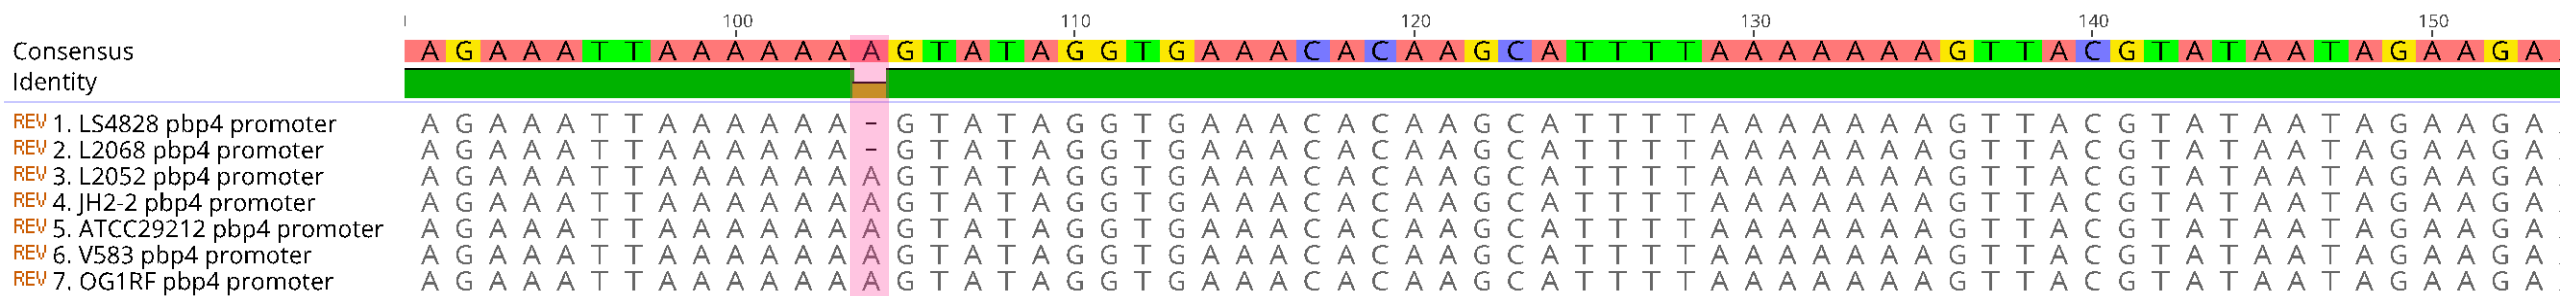

**Supplementary Figure 2.** L2068 *pbp4* gene does not have changes in its structural gene, but it has the same promoter deletion as seen on the LS4828 *pbp4* promoter

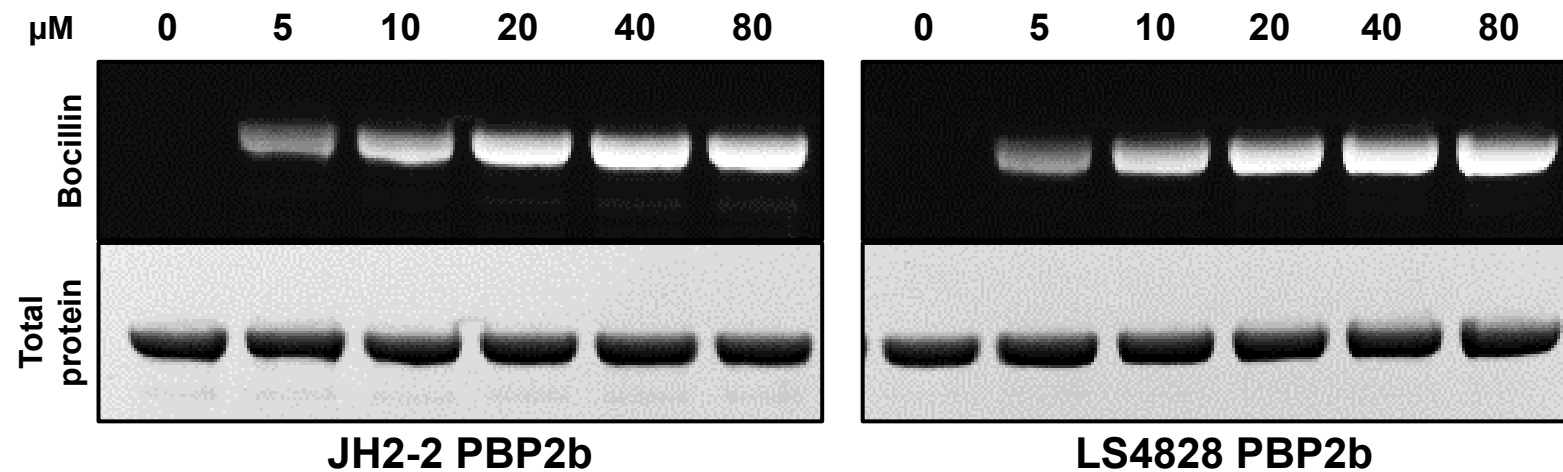

**Supplementary Figure 3. JH2-2 and LS4828 PBP2b proteins show equal BOCILLIN FL™ binding affinities.** Reactions of 3.3 μM purified PBP2b protein, no transmembrane domain, were treated with BOCILLIN FL™ for 20 min. at 37°C then processed for SDS-PAGE and fluorescence was imaged. The gels were subsequently stained for total protein using SimplyBlue SafeStain. These data are representative of 2 independent experiments.

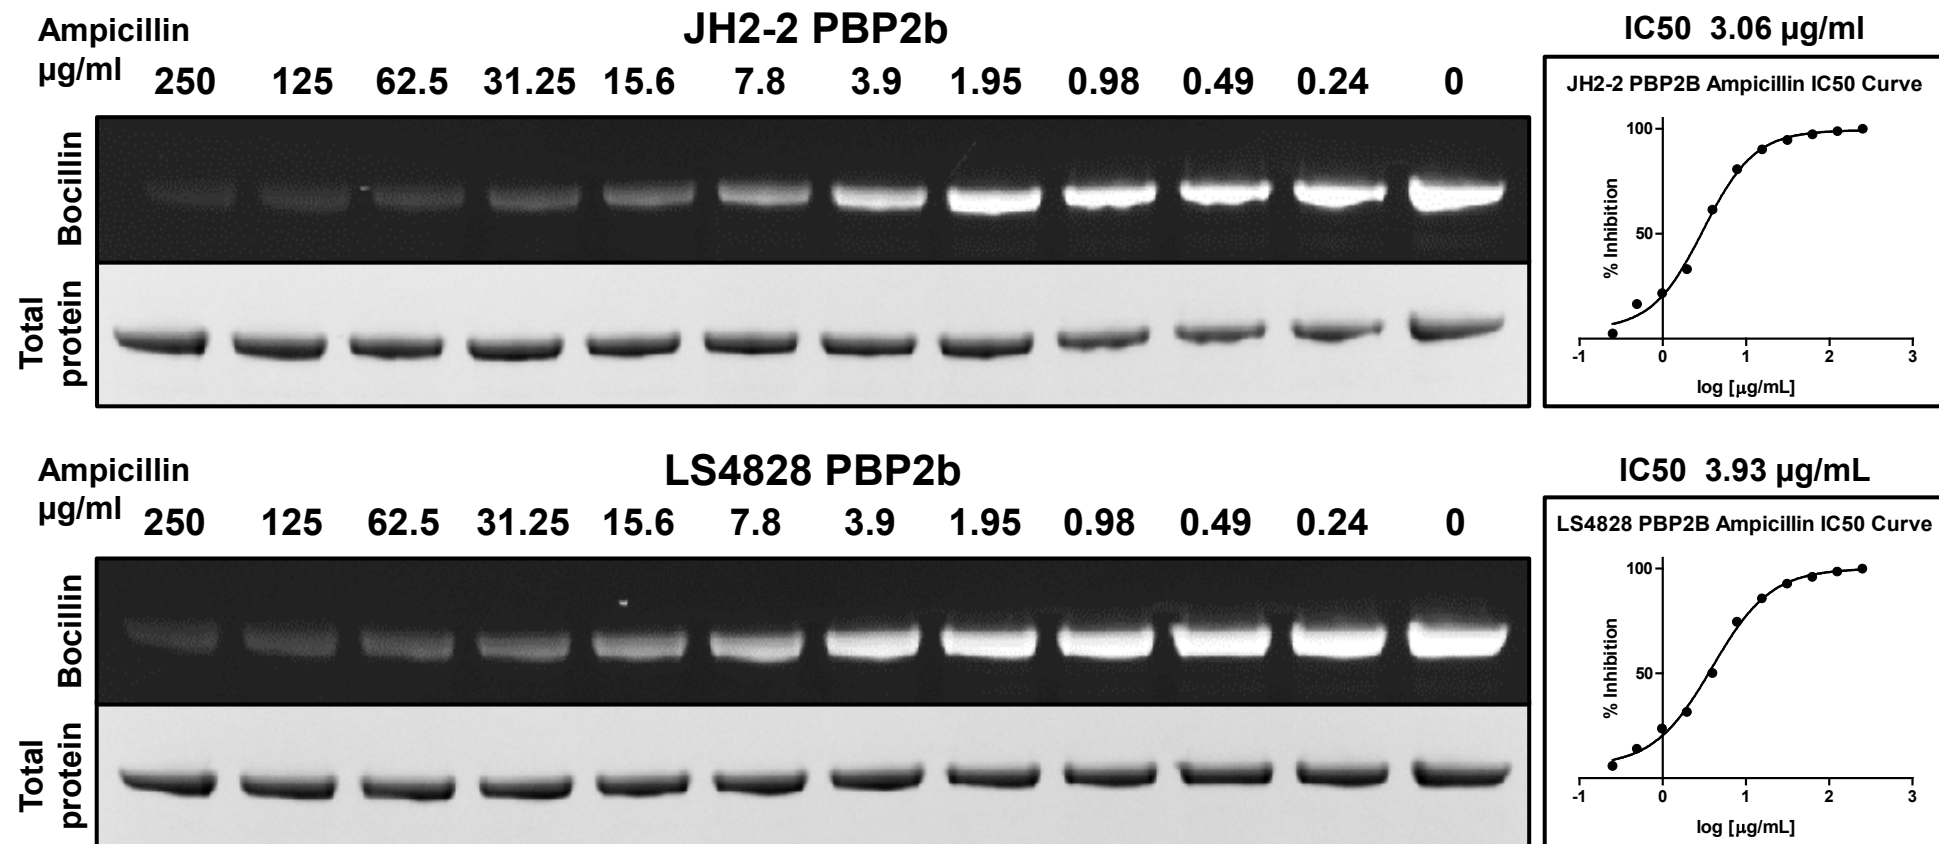

**Supplementary Figure 4. Ampicillin competition using BOCILLIN FL™ for JH2-2 and LS4828 PBP2b proteins.** Reactions of 3.3  $\mu\text{M}$  of purified protein with titrated ampicillin concentrations for 10 minutes were followed by BOCILLIN FL™ labeling. These reactions were subjected to SDS-PAGE, the gel was imaged for fluorescent binding, then stained for total protein using SimplyBlue SafeStain. IC50 curves were generated in Graphpad Prism using percent inhibition data and represent two independent experiments.

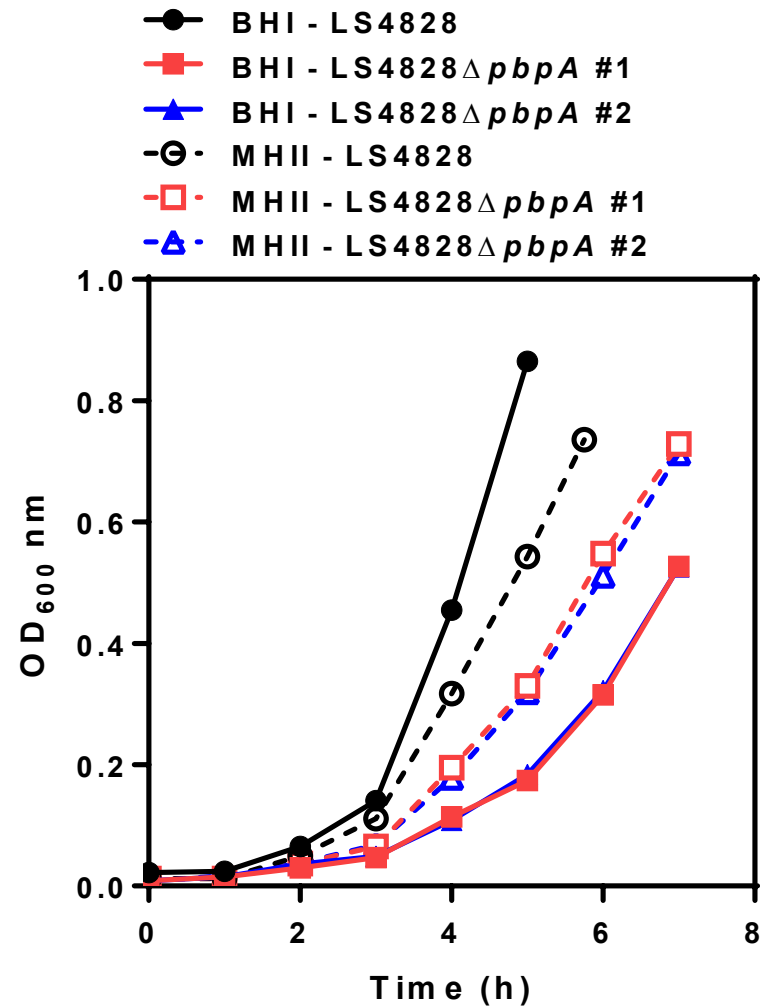

**Supplementary Figure 5. Growth curves for LS4828 and the  $\Delta$ *pbpA* mutant in BHI or MHI broth.** LS4828 and two independent colonies of the  $\Delta$ *pbpA* mutant were inoculated from overnight cultures and followed hourly through early exponential growth at 37°C with shaking at 180 rpm. These data represent at least 2 independent experiments.

**LS4828**

**MHII**

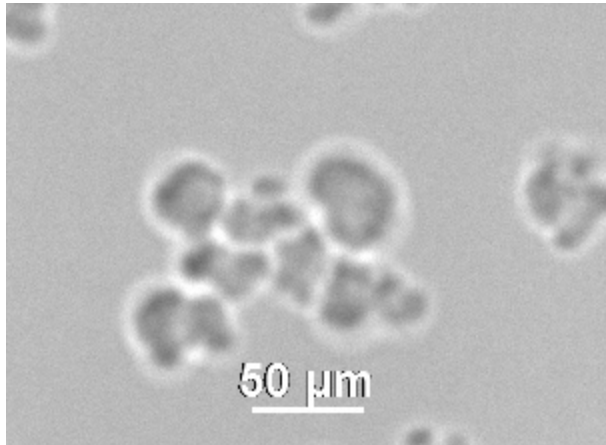

OD = 0.206

**BHI**

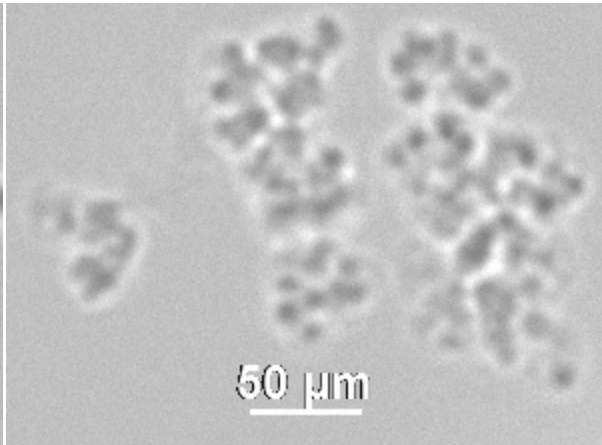

OD = 0.910

**LS4828Δpbp2B**

**MHII**

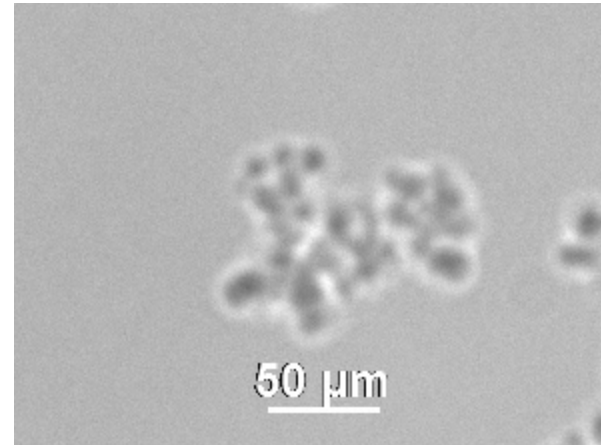

OD = 0.463

**BHI**

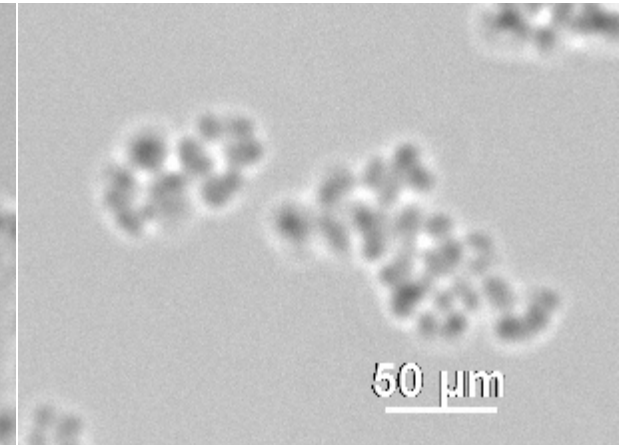

OD = 0.146

**Supplementary Figure 6. Light microscopy imaging of LS4828 and the  $\Delta$ pbpA mutant in Brain-Heart Infusion (BHI) or Mueller-Hinton II (MHII) broth.** The mutant grew slower and to a lower density than the parent strain and there was a size difference with LS4828 grown in MHII appearing larger than the  $\Delta$ pbpA mutant when grown in MHII broth and larger than either isolate grown in BHI. Optical density (OD) values from supplementary figure 5 are included on the bottom for reference.

A.

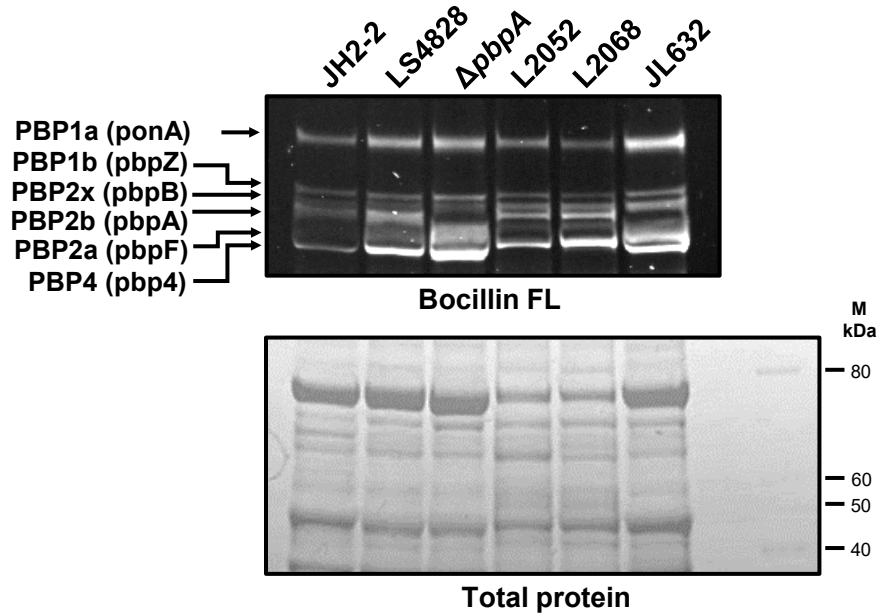

B.

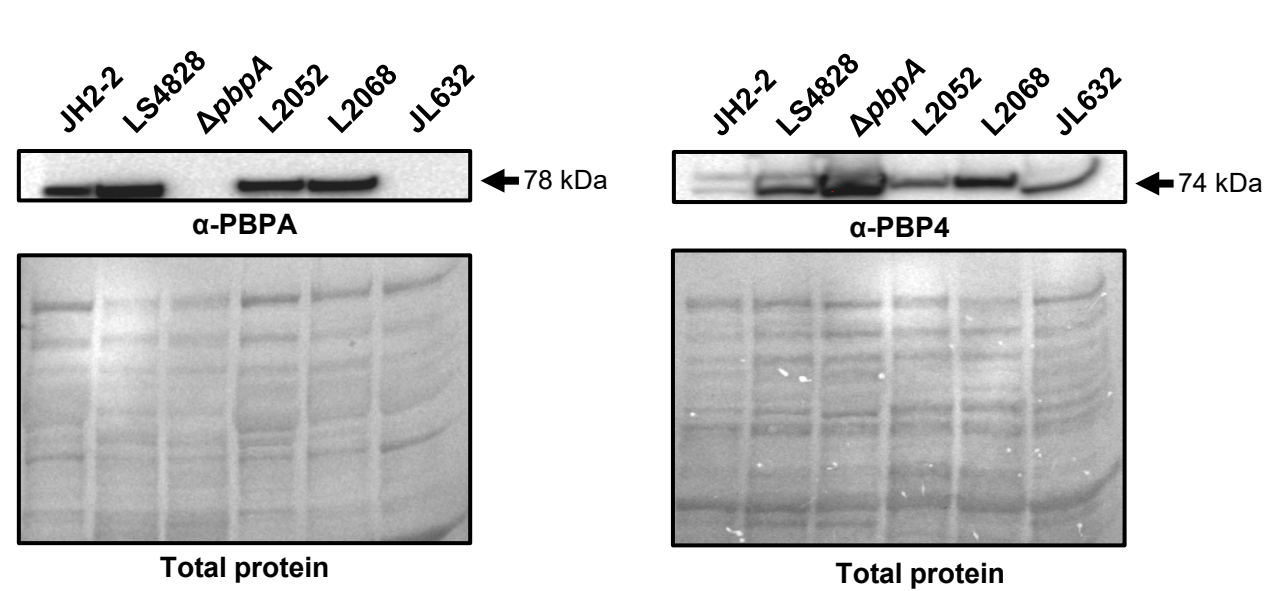

### Supplementary Figure 7. Bocillin FL Binding of Membrane Proteins and Immunodetection of PBP4 and PBPA expression by Western Blot Analysis.

(A) *E. faecalis* purified membrane proteins were incubated at 37°C with 50  $\mu$ M Bocillin FL for 30 minutes and were processed for SDS-PAGE to identify all PBPs. The Bocillin FL gel was subsequently stained with SimplyBlue SafeStain for total protein. (B) Fifteen micrograms of membrane proteins were electrophoresed in 8% Bis-Tris Plus Bolt gels and transferred to PVDF membranes for immunoblot detection of PBP4 or PBPA using custom polyclonal antibody. The PVDF blots were then stained with Coomassie blue R-250 for total proteins transferred.

Note: The PBPs in the Bocillin FL gel were identified according to the pattern observed by Djoric et al (2020) using an 8% SDS-PAGE gel Membrane protein isolation for Bocillin FL and Western blot protocols described in reference (2)

**TABLE S1. Strains and plasmids used in this study**

| Strain or plasmid                           | Relevant characteristic or description                                                        | Reference or source |
|---------------------------------------------|-----------------------------------------------------------------------------------------------|---------------------|
| <b><i>Enterococcus faecalis</i> strains</b> |                                                                                               |                     |
| JH2-2                                       | Penicillin-sensitive isolate; Pen <sup>s</sup> , Amp <sup>s</sup> , Cro <sup>r</sup>          | (1)                 |
| LS4828                                      | Penicillin-resistant clinical isolate; Pen <sup>r</sup> , Amp <sup>r</sup> , Cro <sup>r</sup> | (2)                 |
| L2052                                       | Penicillin-susceptible clinical strain                                                        | Kerry LaPlante      |
| L2068                                       | Penicillin-elevated clinical strain                                                           | Kerry LaPlante      |
| LS319                                       | LS4828 $\Delta pbpA$ ; Pen <sup>r</sup> , Amp <sup>r</sup> , Cro <sup>r</sup>                 | This study          |
| JL632                                       | OG1RF $\Delta pbpA(2b)$ ; Cro <sup>s</sup>                                                    | (3)                 |
| LS310                                       | LS4828 $\Delta pbpA$ with LS4828 <i>pbp2B</i> complement                                      | This study          |
| LS311                                       | LS4828 $\Delta pbpA$ with JH2-2 <i>pbp2B</i> complement                                       | This study          |
| <b><i>Escherichia coli</i> strains</b>      |                                                                                               |                     |
| NEB 10 Beta                                 | routine cloning host                                                                          | NE Biolabs          |
| NEB 5 alpha                                 | routine cloning host                                                                          | NE Biolabs          |
| TOP10                                       | routine cloning host                                                                          | Invitrogen          |
| BL21 Star (DE3)                             | protein expression host                                                                       | Invitrogen          |
| EC1000                                      | <i>E. coli</i> cloning host, provides RepA in trans                                           | (4)                 |
| <b>Plasmids</b>                             |                                                                                               |                     |
| pBSU100                                     | pAT28 derivative carrying <i>egfp</i> ; Spe <sup>r</sup>                                      | (5)                 |
| pRIH310                                     | LS4828 <i>pbpA</i> ORF and promoter cloned into pHOU1; Gen <sup>r</sup>                       | This study          |
| pRIH311                                     | JH2-2 <i>pbpA</i> ORF and promoter cloned into pHOU1; Gen <sup>r</sup>                        | This study          |
| pET-RP1B                                    | Expression vector for amino-terminal His tag fusions                                          | Wolfgang Peti       |



|         |                                                                                                                                |            |
|---------|--------------------------------------------------------------------------------------------------------------------------------|------------|
| pRIH316 | JH2-2 <i>pbpA</i> coding region, no TM domain<br>cloned into pET-RP1B for overexpression in <i>E. coli</i> ; Kan <sup>r</sup>  | This study |
| pRIH317 | LS4828 <i>pbpA</i> coding region, no TM domain cloned<br>into pET-RP1B for overexpression in <i>E. coli</i> ; Kan <sup>r</sup> | This study |
| pHOU1   | Allelic exchange vector; Gen <sup>r</sup> , <i>pheS</i> * counterselection                                                     | (6)        |
| pRIH319 | $\Delta$ <i>pbpA</i> complementation construct cloned into pHOU1; Gen <sup>r</sup>                                             | This study |

---

Abbreviations: Pen penicillin; Amp, ampicillin; Cro, ceftriaxone; Kan, kanamycin; Gen, gentamicin; Spe, spectinomycin.

## References

1. Jacob AE, Hobbs SJ. 1974. Conjugal transfer of plasmid-borne multiple antibiotic resistance in *Streptococcus faecalis* var. *zymogenes*. *Journal of Bacteriology* 117:360-372.
2. Rice LB, Desbonnet C, Tait-Kamradt A, Garcia-Solache M, Lonks J, Moon TM, D'Andrea ED, Page R, Peti W. 2018. Structural and Regulatory Changes in PBP4 Trigger Decreased beta-Lactam Susceptibility in *Enterococcus faecalis*. *MBio* 9.
3. Djoric D, Little JL, Kristich CJ. 2020. Multiple Low-Reactivity Class B Penicillin-Binding Proteins Are Required for Cephalosporin Resistance in Enterococci. *Antimicrob Agents Chemother* 64.

4. Leenhouts K, Buist G, Bolhuis A, ten Berge A, Kiel J, Mierau I, Dabrowska M, Venema G, Kok J. 1996. A general system for generating unlabelled gene replacements in bacterial chromosomes. *Mol Gen Genet* 253:217-24.
5. Aymanns S, Mauerer S, van Zandbergen G, Wolz C, Spellerberg B. 2011. High-level fluorescence labeling of gram-positive pathogens. *PLoS One* 6:e19822.
6. Panesso D, Montealegre MC, Rincon S, Mojica MF, Rice LB, Singh KV, Murray BE, Arias CA. 2011. The hylEfm gene in pHylEfm of *Enterococcus faecium* is not required in pathogenesis of murine peritonitis. *BMC Microbiol* 11:20.
